# Supplementary material for: The Risk G Allele of the Single-Nucleotide Polymorphism rs928413 Creates a CREB1-Binding Site That Activates IL33 Promoter in Lung Epithelial Cells
Source: PubMed Central journal article supplement (PMC6212888; doi:10.3390/ijms19102911), 2018-09-25
Supplement: ijms-19-02911-s001.pdf [file ijms-19-02911-s001.pdf]

## Supplementary materials

### The Risk G Allele of the Single-Nucleotide Polymorphism rs928413 Creates a CREB1-Binding Site that Activates *IL33* Promoter in Lung Epithelial Cells

Table S1.

|                                                                                       |                                |
|---------------------------------------------------------------------------------------|--------------------------------|
| <i>Primers for amplification of IL33 promoter, point mutagenesis in IL33 promoter</i> |                                |
| Prom fw                                                                               | GCGAAGCTTACCATTGAGTACAACCAGAA  |
| Prom rev                                                                              | AATCCATGGTATTTCAGTCTTACCTTGTGA |
| SNP replace Promoter fw                                                               | TTAATAGTTACGAGAGCAT            |
| SNP replace Promoter rev                                                              | ATGCTCTCGTAACTATTAAA           |
| CREB1 site mutation A fw                                                              | TTAATAGCCCCAAGAGCAT            |
| CREB1 site mutation A rev                                                             | ATGCTCTGGGGCTATTAAA            |
| CREB1 site mutation G fw                                                              | TTAATAGCCCCGAGAGCAT            |
| CREB1 site mutation G rev                                                             | ATGCTCTCGGGGCTATTAAA           |
| <i>Primers for amplification of fragments for pull-down assay</i>                     |                                |
| Pull-down fw                                                                          | GAAAGGCAGATCAGGAGAGA           |
| Pull-down rev                                                                         | TTCATTCCCACAACACCGAT           |
| Pul-down control fw                                                                   | TGATCTCGAACTCCTGACCT           |
| Pull-down control rev                                                                 | GTGCTGTGATTACAGGTGTG           |
| <i>Primers for real-time RT-PCR</i>                                                   |                                |
| CREB1 fw                                                                              | ACCACCGGTAACATAAATGACCA        |
| CREB1 rev                                                                             | CCCATTGGGCAGCTGTACT            |
| $\beta$ -actin fw                                                                     | TGCGTGACATTAAGGAGAAG           |
| $\beta$ -actin rev                                                                    | GTCAGGCAGCTCGTAGCTCT           |
| <i>siRNAs for CREB1 knockdown</i>                                                     |                                |
| siRNA sense                                                                           | GGAGGAGAGUCGCUACCUAtt          |
| siRNA antisense                                                                       | UAGGUAGCGACUCUCCUCtg           |
| Scrambled sense                                                                       | GGUCGGCACACGUGAUGAAtt          |
| Scrambled antisense                                                                   | UUCAUCACGUGUGCCGACCtg          |

Fw: forward primer; rev: reverse primer.
